# Supplementary material for: Validity and reliability of CVI Range assessment for Clinical Research (CVI Range-CR): a longitudinal cohort study
Source: HighWire-hosted journal article supplement (doi:10.1136/bmjophth-2022-001144), 2022-10-01
Supplement: bmjophth-2022-001144supp001_data_supplement.pdf [file bmjophth-2022-001144supp001_data_supplement.pdf]

Supplemental Table 1. Six-level Visual Behavior Scale (VBS) completed based on ophthalmologist's examination.

|   |                                                                                                                  |
|---|------------------------------------------------------------------------------------------------------------------|
| 6 | No behavioral response to light                                                                                  |
| 5 | Response to light under any ambient illumination                                                                 |
| 4 | Response to motion                                                                                               |
| 3 | Poor fixation, but redirection of gaze or head position toward any object (e.g., face or large toy)              |
| 2 | Ability to accurately fixate and follow a 6-inch colorful toy, at a distance of 1 foot against any background    |
| 1 | Ability to accurately fixate upon and follow a 1-inch, colorful, unlighted toy at 1 foot against any background. |

Supplemental Table 2. These 24 questions will be asked by the in-person examiner during the parent interview.

|     |                                                                                                                                                                |
|-----|----------------------------------------------------------------------------------------------------------------------------------------------------------------|
| 1.  | Tell me what you do with a toy to get your child interested in it.                                                                                             |
| 2.  | When you show your child something, how do you know he or she sees it?                                                                                         |
| 3.  | Does your child have a favorite side or a favorite head position?                                                                                              |
| 4.  | Does your child usually find objects by looking or by feeling for them?                                                                                        |
| 5.  | Do you have concerns about the way your child sees?                                                                                                            |
| 6.  | Where do you usually hold objects for your child to look at?                                                                                                   |
| 7.  | What are your child's favorite things in your house?                                                                                                           |
| 8.  | What, if anything, have doctors told you about your child's eyes?                                                                                              |
| 9.  | When does your child usually like to look at things?                                                                                                           |
| 10. | What color(s) are the things your child likes to look at most?                                                                                                 |
| 11. | What does your child do when he or she is near very shiny or mirrored objects?                                                                                 |
| 12. | Describe how your child behaves around lamps or ceiling fans.                                                                                                  |
| 13. | Are you usually able to identify (be certain of) what your child is looking at?                                                                                |
| 14. | Does your child usually first notice things that move or things that don't move?                                                                               |
| 15. | How does your child position his or her head when you think he or she is looking? How do they position their head while swatting or reaching toward something? |
| 16. | Is there a color that your child sees more than other colors?                                                                                                  |
| 17. | Does your child seem to notice things more at home or more in new places?                                                                                      |
| 18. | How does your child react when you give him or her new things to look at?                                                                                      |
| 19. | Do you position your child in a certain way to help him or her see things?                                                                                     |
| 20. | Have you ever been concerned about the way your child's eyes move?                                                                                             |
| 21. | What does your child do when there are many objects in front of him or her to look at?                                                                         |
| 22. | Tell me about how he/she responds to faces?                                                                                                                    |
| 23. | If he/she has his or her own object to look at and a new object, which object do you think he or she would prefer?                                             |
| 24. | Tell me what your child's favorite objects or toys look like.                                                                                                  |

Supplemental Table 3. Scoring algorithm for Across-CVI Characteristics method of scoring CVI Range-CR. Each characteristic in a block is graded as Resolved (R), currently present (+), partially present (+/-), or not present (-). A decimal or ordinal score is calculated based on the number of characteristics graded as R or +.

| Block | Number Items Demonstrated in Block (R/+) | Total # Items Demonstrated, Except Overscores | Decimal Score | Ordinal Score |
|-------|------------------------------------------|-----------------------------------------------|---------------|---------------|
| 1-2   | 0                                        | 0                                             | 0             | 0             |
|       | 1                                        | 1                                             | 0.2           | 0+            |
|       | 2                                        | 2                                             | 0.4           | 0+            |
|       | 3                                        | 3                                             | 0.6           | 0+            |
|       | 4                                        | 4                                             | 0.8           | 0+            |
|       | 5                                        | 5                                             | <b>1</b>      | <b>1</b>      |
|       | 6                                        | 6                                             | 1.25          | 1+            |
|       | 7                                        | 7                                             | 1.5           | 1+            |
|       | 8                                        | 8                                             | 1.75          | 1+            |
| 3-4   | 9                                        | 9                                             | <b>2</b>      | <b>2</b>      |
|       | 1                                        | 10                                            | 2.2           | 2+            |
|       | 2                                        | 11                                            | 2.4           | 2+            |
|       | 3                                        | 12                                            | 2.6           | 2+            |
|       | 4                                        | 13                                            | 2.8           | 2+            |
|       | 5                                        | 14                                            | <b>3</b>      | <b>3</b>      |
|       | 6                                        | 15                                            | 3.25          | 3+            |
|       | 7                                        | 16                                            | 3.5           | 3+            |
|       | 8                                        | 17                                            | 3.75          | 3+            |
| 5-6   | 9                                        | 18                                            | <b>4</b>      | <b>4</b>      |
|       | 1                                        | 19                                            | 4.2           | 4+            |
|       | 2                                        | 20                                            | 4.4           | 4+            |
|       | 3                                        | 21                                            | 4.6           | 4+            |
|       | 4                                        | 22                                            | 4.8           | 4+            |
|       | 5                                        | 23                                            | <b>5</b>      | <b>5</b>      |
|       | 6                                        | 24                                            | 5.25          | 5+            |
|       | 7                                        | 25                                            | 5.5           | 5+            |
|       | 8                                        | 26                                            | 5.75          | 5+            |
| 7-8   | 9                                        | 27                                            | <b>6</b>      | <b>6</b>      |
|       | 1                                        | 28                                            | 6.2           | 6+            |
|       | 2                                        | 29                                            | 6.4           | 6+            |
|       | 3                                        | 30                                            | 6.6           | 6+            |
|       | 4                                        | 31                                            | 6.8           | 6+            |
|       | 5                                        | 32                                            | <b>7</b>      | <b>7</b>      |
|       | 6                                        | 33                                            | 7.2           | 7+            |
|       | 7                                        | 34                                            | 7.4           | 7+            |
|       | 8                                        | 35                                            | 7.6           | 7+            |
|       | 9                                        | 36                                            | 7.8           | 7+            |
| 9-10  | 10                                       | 37                                            | <b>8</b>      | <b>8</b>      |
|       | 1                                        | 38                                            | 8.17          | 8+            |
|       | 2                                        | 39                                            | 8.33          | 8+            |
|       | 3                                        | 40                                            | 8.50          | 8+            |
|       | 4                                        | 41                                            | 8.67          | 8+            |
|       | 5                                        | 42                                            | 8.83          | 8+            |
|       | 6                                        | 43                                            | <b>9</b>      | <b>9</b>      |
|       | 7                                        | 44                                            | 9.17          | 9+            |
|       | 8                                        | 45                                            | 9.33          | 9+            |
|       | 9                                        | 46                                            | 9.50          | 9+            |
|       | 10                                       | 47                                            | 9.67          | 9+            |
|       | 11                                       | 48                                            | 9.83          | 9+            |
| 12    | 49                                       | <b>10</b>                                     | <b>10</b>     |               |

Supplemental Worksheets. Scoring worksheets for Across- and Within-CVI Characteristics methods of scoring the CVI Range.

### **The CVI Range: Across-CVI Characteristics Assessment Method**

#### ***Rating I***

Rate the following statements as related to the student/child's visual behaviors by marking the appropriate column to indicate the methods used to support the scores:

**O** = Information obtained through observation of the student/child

**I** = Information obtained through interview regarding the student/child

**D** = Information obtained through direct contact with the student/child

In the remaining columns, rate each statement with one of the following descriptors:

**R** = Represents a visual behavior that is resolving or approaching typical behavior

**+** = Describes current functioning of student/child

**+/-** = Partially describes the student/child emerging

**-** = Does not apply to student/child

## The CVI Range: Across-CVI Characteristics Assessment Method

---

### CVI Range 1-2: Student functions with minimal visual responses

| O | I | D | R | + | +/- | - |                                                                    |
|---|---|---|---|---|-----|---|--------------------------------------------------------------------|
|   |   |   |   |   |     |   | May localize, but no appropriate fixations on objects or faces     |
|   |   |   |   |   |     |   | Consistently attentive to lights or perhaps ceiling fans           |
|   |   |   |   |   |     |   | Prolonged periods of latency in visual tasks                       |
|   |   |   |   |   |     |   | Responds only in strictly controlled environments                  |
|   |   |   |   |   |     |   | Objects viewed are a single color                                  |
|   |   |   |   |   |     |   | Objects viewed have movement and/or shiny or reflective properties |
|   |   |   |   |   |     |   | Visually attends in near space only                                |
|   |   |   |   |   |     |   | No blink in response to touch or visual threat                     |
|   |   |   |   |   |     |   | No regard of the human face                                        |

### CVI Range 3-4: Student functions with more consistent visual response

| O | I | D | R | + | +/- | - |                                                                                                       |
|---|---|---|---|---|-----|---|-------------------------------------------------------------------------------------------------------|
|   |   |   |   |   |     |   | Visually fixates when the environment is controlled                                                   |
|   |   |   |   |   |     |   | Less attracted to lights: can be redirected                                                           |
|   |   |   |   |   |     |   | Latency slightly decreases after periods of consistent viewing                                        |
|   |   |   |   |   |     |   | May look at novel objects if they share characteristics of familiar objects                           |
|   |   |   |   |   |     |   | Blinks in response to touch and/or visual threat, but the responses may be latent and/or inconsistent |
|   |   |   |   |   |     |   | Has "favorite" color                                                                                  |
|   |   |   |   |   |     |   | Shows strong visual field preferences                                                                 |
|   |   |   |   |   |     |   | May notice moving objects at 2 to 3 feet                                                              |
|   |   |   |   |   |     |   | Look and touch completed as separate events                                                           |

**CVI Range 5-6: Student uses vision for functional tasks**

| O | I | D | R | + | +/- | - |                                                                             |
|---|---|---|---|---|-----|---|-----------------------------------------------------------------------------|
|   |   |   |   |   |     |   | Objects viewed may have two to three colors                                 |
|   |   |   |   |   |     |   | Light is no longer a distractor                                             |
|   |   |   |   |   |     |   | Latency present only when the student is tired, stressed, or overstimulated |
|   |   |   |   |   |     |   | Movement continues to be an important factor for visual attention           |
|   |   |   |   |   |     |   | Student tolerates low levels of background noise                            |
|   |   |   |   |   |     |   | Blink response to touch is consistently present                             |
|   |   |   |   |   |     |   | Blink response to visual threat is intermittently present                   |
|   |   |   |   |   |     |   | Visual attention now extends beyond near space, up to 4 to 6 feet           |
|   |   |   |   |   |     |   | May regard familiar faces when voices do not compete                        |

**CVI Range 7-8: Student demonstrates visual curiosity**

| O | I | D | R | + | +/- | - |                                                                                                                                             |
|---|---|---|---|---|-----|---|---------------------------------------------------------------------------------------------------------------------------------------------|
|   |   |   |   |   |     |   | Selection of toys or objects is less restricted; requires one to two sessions of “warm up”                                                  |
|   |   |   |   |   |     |   | Competing auditory stimuli tolerated during periods of viewing; the student may now maintain visual attention on objects that produce music |
|   |   |   |   |   |     |   | Blink response to visual threat consistently present                                                                                        |
|   |   |   |   |   |     |   | Latency rarely present                                                                                                                      |
|   |   |   |   |   |     |   | Visual attention extends to 10 feet with targets that produce movement                                                                      |
|   |   |   |   |   |     |   | Movement not required for attention at near distance                                                                                        |
|   |   |   |   |   |     |   | Smiles at/regards familiar and new faces                                                                                                    |
|   |   |   |   |   |     |   | May enjoy regarding self in mirror                                                                                                          |
|   |   |   |   |   |     |   | Most high-contrast colors and/or familiar patterns regarded and interpreted                                                                 |
|   |   |   |   |   |     |   | Simple books, picture cards, or symbols regarded and interpreted                                                                            |

**CVI Range 9-10: Student spontaneously uses vision for most functional activities at level approaching near typical**

| O | I | D | R | + | +/- | - |                                                                                                                           |
|---|---|---|---|---|-----|---|---------------------------------------------------------------------------------------------------------------------------|
|   |   |   |   |   |     |   | Selection of toys or objects not restricted to the familiar; visually curious in new settings                             |
|   |   |   |   |   |     |   | Only the most complex environments affect visual response                                                                 |
|   |   |   |   |   |     |   | Latency never present                                                                                                     |
|   |   |   |   |   |     |   | No color or pattern preference                                                                                            |
|   |   |   |   |   |     |   | Visual attention and interpretation extends beyond 20 feet                                                                |
|   |   |   |   |   |     |   | Views and interprets information from non-backlit two-dimensional materials and simple images                             |
|   |   |   |   |   |     |   | Uses vision to imitate actions                                                                                            |
|   |   |   |   |   |     |   | Demonstrates memory of visual events                                                                                      |
|   |   |   |   |   |     |   | Displays typical visual-social responses                                                                                  |
|   |   |   |   |   |     |   | Visual fields unrestricted                                                                                                |
|   |   |   |   |   |     |   | Look and reach completed as a single action                                                                               |
|   |   |   |   |   |     |   | Views and interprets information from non-backlit two-dimensional images presented on complex, visually dense backgrounds |

### The CVI Range: Within-CVI Characteristics Assessment Method

Determine the level of CVI present or resolved in the 10 categories below and add to obtain total score. Rate the following CVI categories as related to the student/child's visual behaviors by circling the appropriate number (the CVI Progress Chart may be useful as a scoring guide):

**0** Full effect of the characteristic is present

**.25** Behavior on this characteristic has begun to change or improve

**.5** The characteristic is affecting visual functioning approximately half the time

**.75** Occasional effect of the characteristic; response is nearly like that of individuals the same age

**1** Resolving, approaching typical, or response is the same as others of the same age

|                                                                                       |          |            |           |            |          |
|---------------------------------------------------------------------------------------|----------|------------|-----------|------------|----------|
| <b>1. Color Preference</b>                                                            | <b>0</b> | <b>.25</b> | <b>.5</b> | <b>.75</b> | <b>1</b> |
| <b>2. Need for movement</b>                                                           | <b>0</b> | <b>.25</b> | <b>.5</b> | <b>.75</b> | <b>1</b> |
| <b>3. Visual latency</b>                                                              | <b>0</b> | <b>.25</b> | <b>.5</b> | <b>.75</b> | <b>1</b> |
| <b>4. Visual field preferences</b>                                                    | <b>0</b> | <b>.25</b> | <b>.5</b> | <b>.75</b> | <b>1</b> |
| <b>5. Difficulties with visual complexity-</b><br>object<br>array<br>sensory<br>faces | <b>0</b> | <b>.25</b> | <b>.5</b> | <b>.75</b> | <b>1</b> |
|                                                                                       |          | <b>.25</b> | <b>.5</b> | <b>.75</b> | <b>1</b> |
|                                                                                       | <b>0</b> | <b>.25</b> | <b>.5</b> | <b>.75</b> | <b>1</b> |
|                                                                                       |          | <b>.25</b> | <b>.5</b> | <b>.75</b> | <b>1</b> |
|                                                                                       | <b>0</b> | <b>.25</b> | <b>.5</b> | <b>.75</b> | <b>1</b> |
| <b>6. Need for light</b>                                                              | <b>0</b> | <b>.25</b> | <b>.5</b> | <b>.75</b> | <b>1</b> |
| <b>7. Difficulty with distance viewing</b>                                            | <b>0</b> | <b>.25</b> | <b>.5</b> | <b>.75</b> | <b>1</b> |



|                                             |          |            |           |            |          |
|---------------------------------------------|----------|------------|-----------|------------|----------|
|                                             |          |            |           |            |          |
| <b>8. Atypical visual reflexes</b>          | <b>0</b> | <b>.25</b> | <b>.5</b> | <b>.75</b> | <b>1</b> |
| <b>9. Difficulty with visual novelty</b>    | <b>0</b> | <b>.25</b> | <b>.5</b> | <b>.75</b> | <b>1</b> |
| <b>10. Absence of visually guided reach</b> | <b>0</b> | <b>.25</b> | <b>.5</b> | <b>.75</b> | <b>1</b> |
